# Supplementary material
Source: PubMed Central journal article supplement (PMC7199048)

# Simplified Protocol for the Treatment of Uncomplicated Severe Acute Malnutrition Integrated into iCCM

Simplified Tools and  
Training Guidelines

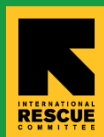

# Introduction

This is a guidebook for training front line low-literate community health workers (CHWs) in the use of the simplified tools and protocol for treating severe acute malnutrition (SAM) and uncomplicated severe acute malnutrition. Step-by-step instructions and images show how to use each tool and how to follow the simplified protocol to treat children suffering from uncomplicated severe acute malnutrition.

**Part 1** describes the simplified tools and how to use them

**MUAC Tape:** a modified mid-upper arm circumference (MUAC) tape with additional color zones that can be used for admission, monitoring and discharge purposes

**RUTF Dosage Scale:** a dot system used with the standard Salter scale to help those who cannot read numbers determine the correct daily dosage of Ready-to-Use Therapeutic Food (RUTF). Each cluster of dots represents the number of RUTF sachets to be given daily based on the child's weight

**RUTF Dosage Calculator:** a device that has individual pockets for each day of the week to help CHWs count and give out the correct weekly (7 day) dosage of RUTF

**Patient Register:** a register that does not require the ability to read in order to use, and captures all the important patient details and weekly monitoring readings over four months.

**Key messages for how to give RUTF at home:** a flipchart that demonstrates the key steps for how to give RUTF at home. This tool aids CHWs in explaining the RUTF feeding process to caregivers.

**Part 2** describes essential procedures (non-tool related) for diagnosing and treating severe acute malnutrition

**Part 3** describes the full simplified SAM treatment protocol

**Part 4** describes the iCCM + SAM treatment protocol

# Table of Contents

Acronyms .....7

## Part 1: Simplified Tools

1.1 MUAC Tape .....11  
1.2 RUTF Dosage Scale.....19  
1.3 RUTF Dosage Calculator.....27  
1.4 Patient Register.....31  
1.5 Key RUTF Feeding Messages.....47

## Part 2: Essential Procedures

Checking for Bilateral Pitting Oedema.....53  
Appetite Test.....55  
Danger Signs.....59

## Part 3: Simplified SAM Treatment Protocol

3.1 Week 1.....69  
3.2 Week 2.....79  
3.3 Week 3-16 .....85  
3.4 Discharge Criteria .....91

## Part 4: iCCM + SAM Treatment Protocol

Malaria + SAM.....100  
Pneumonia + SAM.....102  
Diarrhea + SAM .....104

# Acronyms

**CHW**

Community Health Worker

**iCCM**

Integrated Community Case Management

**ID**

Identification

**MUAC**

Mid-Upper Arm Circumference

**OTP**

Outpatient Therapeutic Program

**PHCC**

Primary Health Care Center

**PHCU**

Primary Health Care Unit

**RUTF**

Ready-to-use Therapeutic Food

**SAM**

Severe Acute Malnutrition

**TSFP**

Targeted Supplementary Feeding Program

# Part 1: Simplified Tools

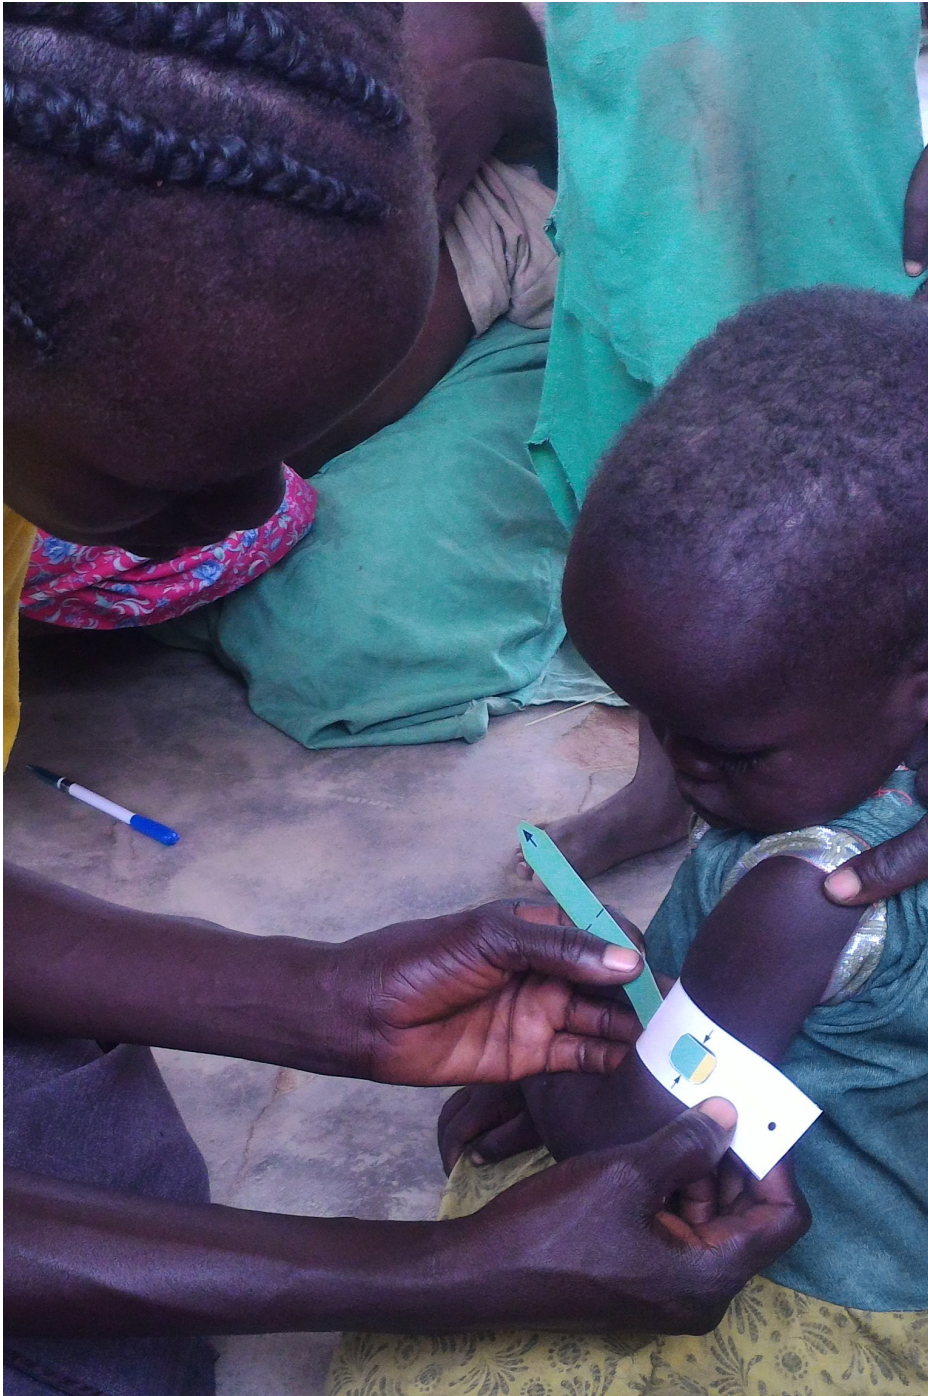

# 1.1 Mid-Upper Arm Circumference Tape (MUAC Tape)

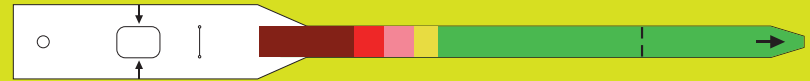

# MUAC Tape: How to use

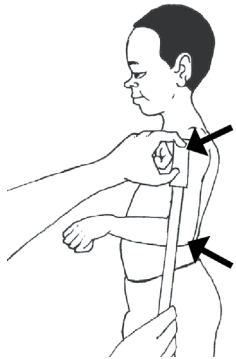

1. Locate the midpoint of the child's upper arm (bicep area) using a string. (Do not bend the MUAC tape in half to find the midpoint)

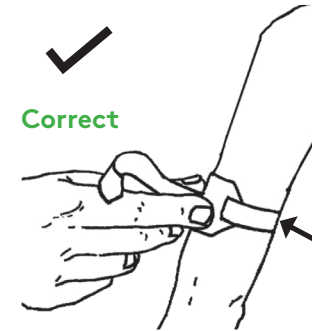

4. Pull the tape until it fits snugly against the child's arm, neither too loosely nor too tightly.

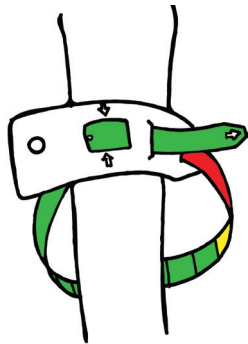

2. Wrap tape around the midpoint of the child's upper arm.

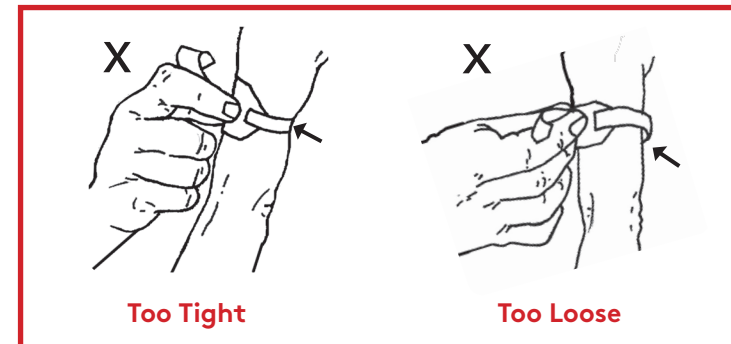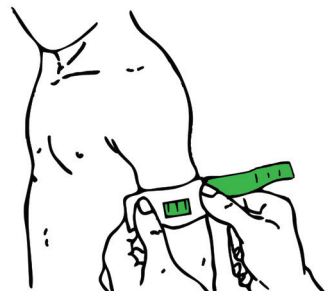

3. Slide the pointed end of the green zone (end of the tape) through the narrow slit in the white part of the tape.

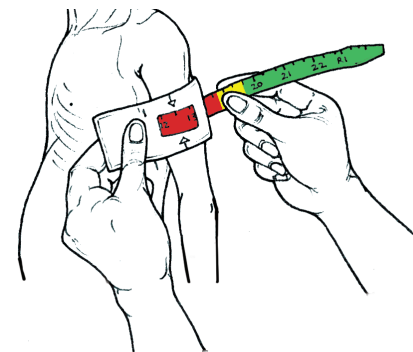

5. While holding down the white end of the MUAC, read the color between the two arrows. This shows child's status.

## Suggested Training Activities

1. Each CHW should take MUAC on her neighbor while explaining the key steps (even if the MUAC doesn't wrap fully around the arm)
2. Color identification: Show CHWs the cards with the different MUAC colors and have them practice identifying the colors, first in order, then out of order. Ask which colors are different from the MUAC they used in the past.
3. Prepare several bamboo rods of different diameters and number each one. Two trainers should each take the MUAC of each rod and record the color. Each CHW should take several MUAC readings of different size bamboo rods. Trainers should check the results against their measurements and help the CHWs to correct their errors.
4. Prepare a practice session where CHWs will measure and record the color of MUAC on children from the OTP. Check for common errors including identifying the midpoint, having the tape too loose and having the tape too tight.

## Materials Needed

1. New MUAC tapes
2. Cards in the five MUAC colors
3. Bamboo rods of different diameters
4. Pens

## MUAC Tape: What it means

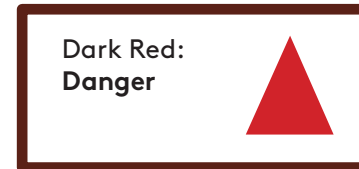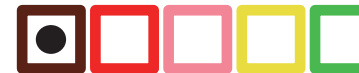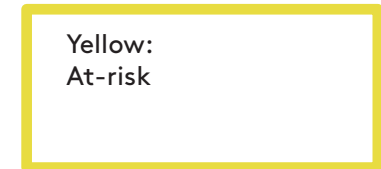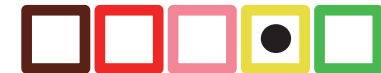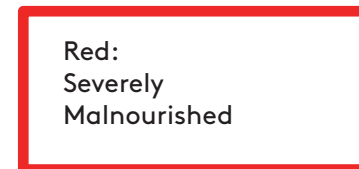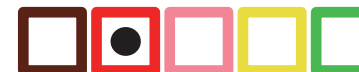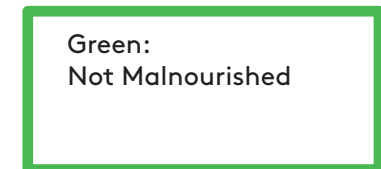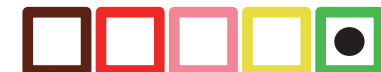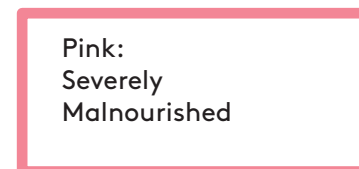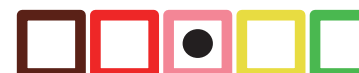





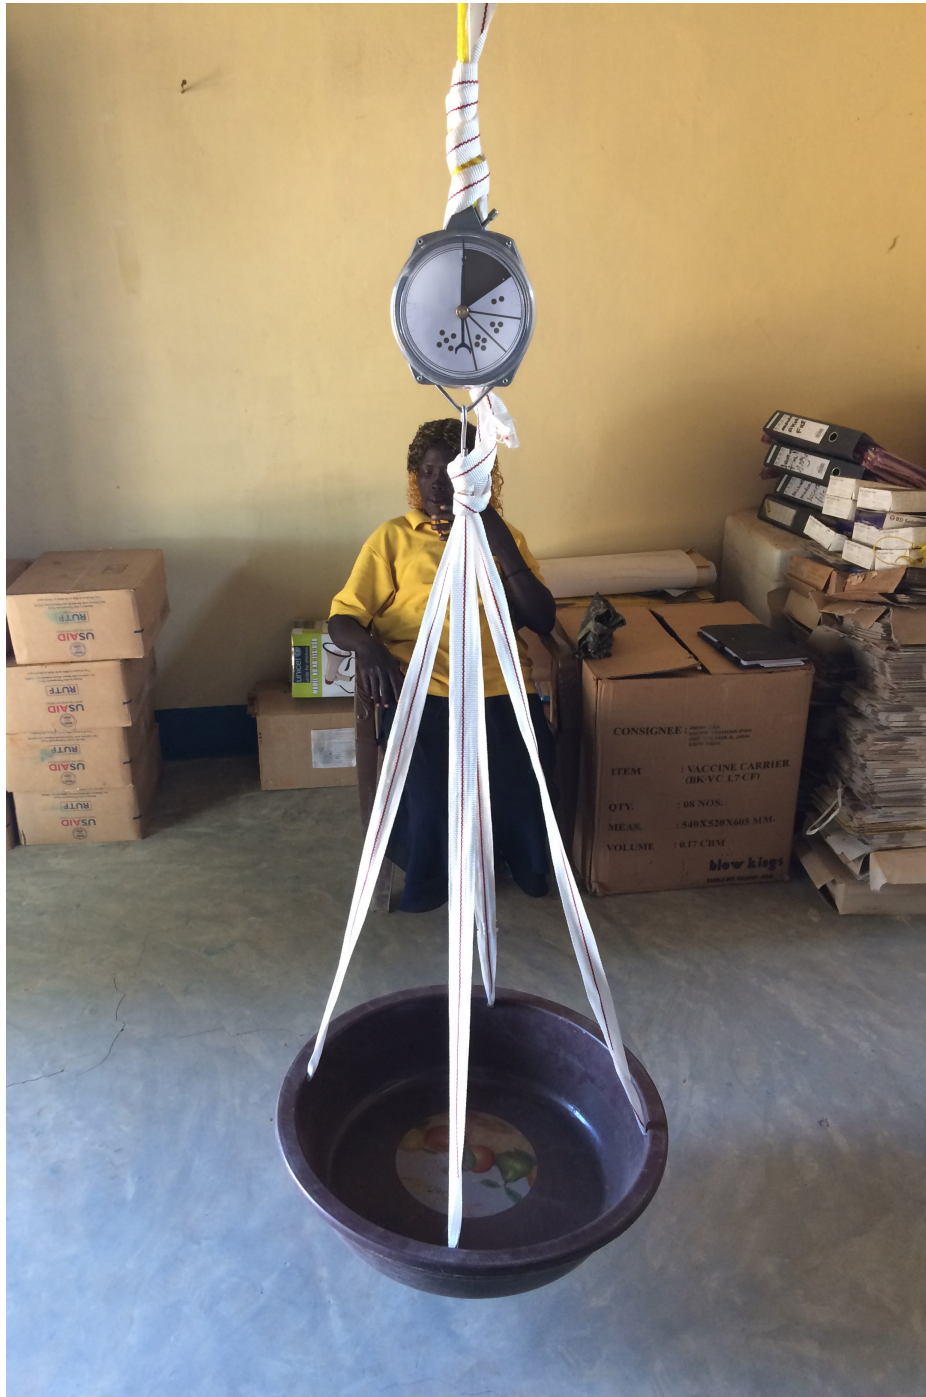

## 1.2 Ready-to-Use Therapeutic Food (RUTF) Dosage Scale

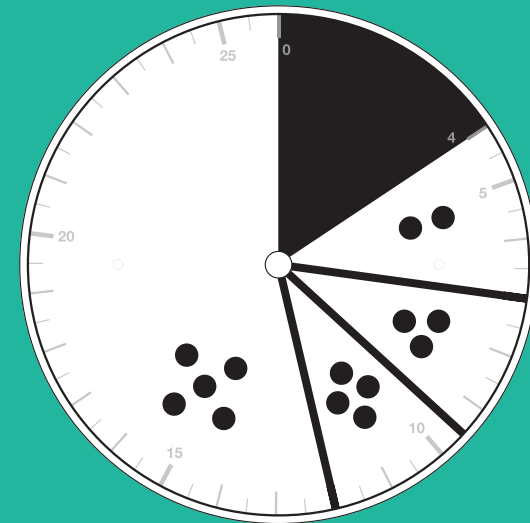

# Dosage Scale: How to use

Setting up the scale:

- 1 . Find a sturdy branch or beam to hang the scale.
- 2 . Ensure that the scale and basin are tied securely and the basin is hanging low to the ground.
- 3 . Set the scale to 0 (the arrow should point straight at the zero like the below image).

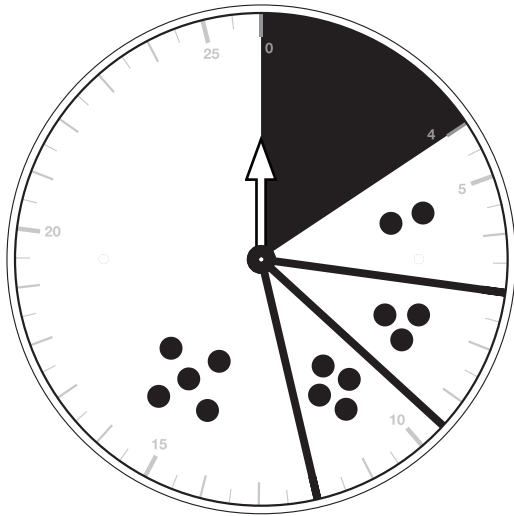

## Suggested Training Activities

1. Have CHWs identify appropriate locations in the training area to hang a scale and practice hanging up the scale and basin.
2. Set the scale to less than 0 or greater than 0 and have the CHWs adjust it to the right location.

## Materials Needed

1. Salter scales
2. Basins
3. Rope

# Dosage Scale: How to use

## Weighing the Child:

1. The child should be undressed as much as possible.
2. Put the child into the basin and weigh the child using the hanging scale.
3. See the zone the scale's arrow stops in and count the number of dots in it.
4. The number of dots is the number of RUTF sachets the child is to eat each day.
5. If the arrow falls on the black line, round up to the next zone.

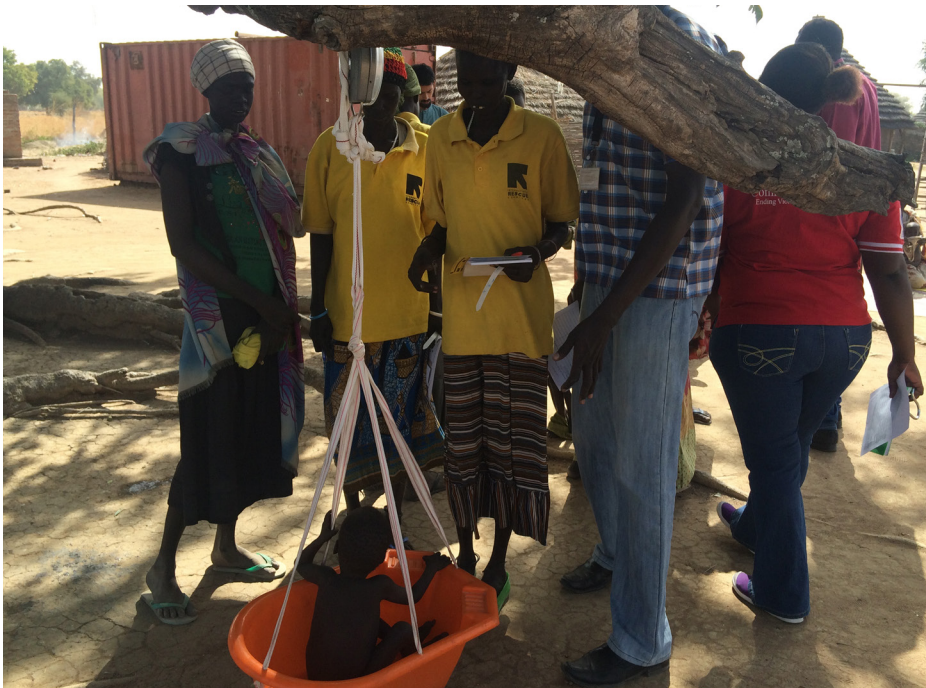

# Dosage Scale: What it means

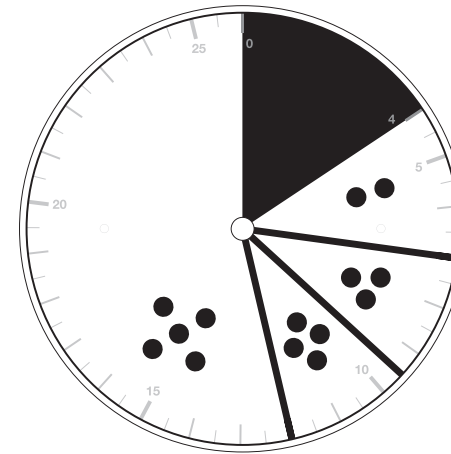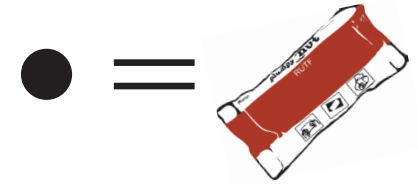

**Black area**  
Refer immediately

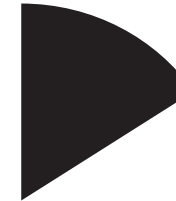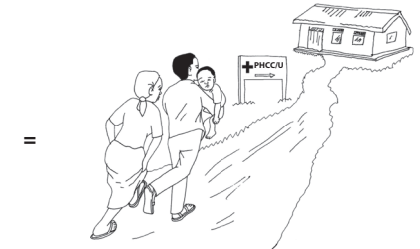

2 dots = 2 sachets of RUTF per day

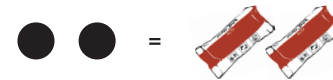

4 dots = 4 sachets of RUTF per day

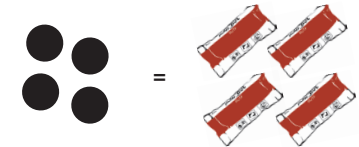

3 dots = 3 sachets of RUTF per day

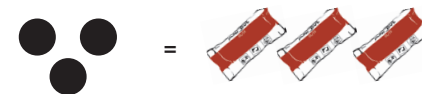

5 dots = 5 sachets of RUTF per day

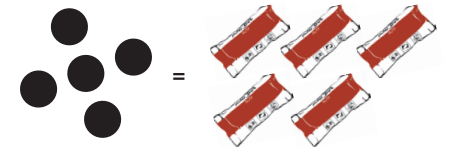



## Suggested Training Activities

1. Show CHWs the cards with different numbers of dots on them and have them mark the corresponding place on the register.
2. Prepare bags with various weights for CHWs to weigh to practice identifying and recording the number of sachets.
3. Have CHWs practice weighing children from the OTP and recording the corresponding number of sachets.

## Materials Needed

1. Cards with 2-5 dots on them and one card that is black
2. Salter scale, basin, rope
3. Bags with different weights
4. Individual color copies of the register sheet

## Dosage Calculator: How to use

1. Place the number of RUTF sachets per day on each square in the calculator.
2. Explain to the caregiver that each square represents the number of sachets the child should eat each day.
3. When all seven days have been counted out, double check, then transfer the weekly supply to a carrying bag for the caregiver.

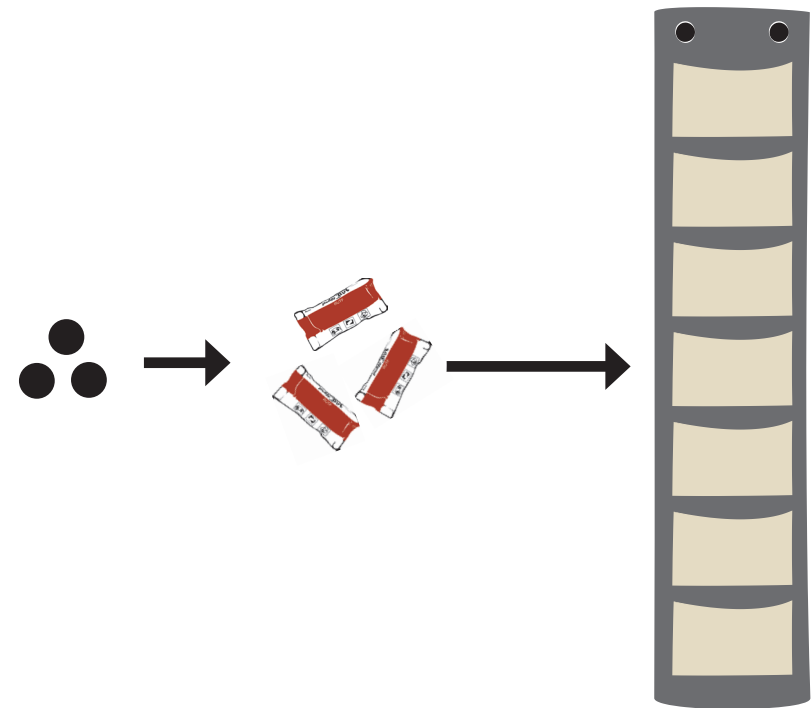

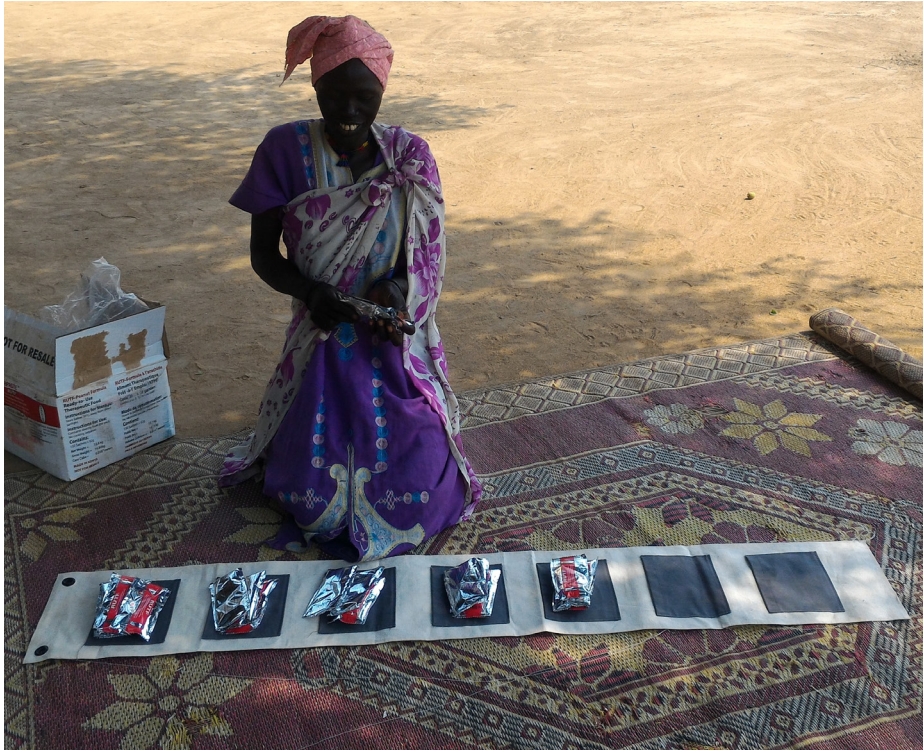

## Suggested Training Activities

1. Practice counting days 1-7 using the pockets on the dosage calculator.
2. Show CHWs the cards with the different number of dots on them and have them practice counting out a full week of RUTF sachets using the calculator.
3. Prepare bags with various weights for CHWs to weigh to practice identifying and preparing the number of sachets to distribute.
4. Have CHWs practice weighing children from the OTP, preparing the corresponding number of sachets, and recording on the individual register sheets.

## Materials Needed

1. Dosage calculator
2. Cards with 2-5 dots on them and one card that is black
3. Salter scale, basin, rope
4. Bags with different weights
5. Individual color copies of the register sheet
6. Pens





# Patient Register: Sex

1. This is filled in when the child is admitted for the first time.
2. Ask the caregiver the sex of the child.
3. Mark the box below the image that matches to the child's sex.

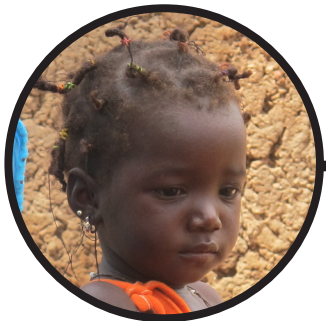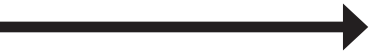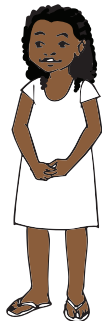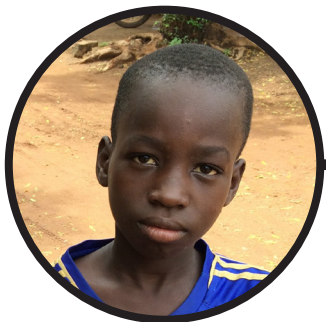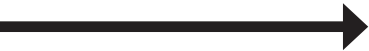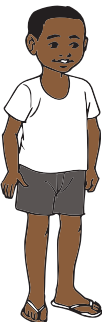

# Patient Register: Age

1. This is filled in when the child is admitted for the first time.
2. Determine if the child is an infant (i.e., 6-11 months) or a toddler (i.e., 12-59 months)
3. Mark the box below the image that matches to the child's age group. An infant is crawling. A toddler is standing.

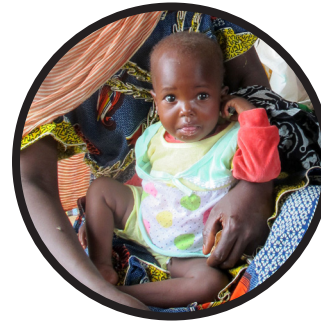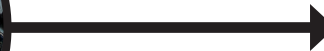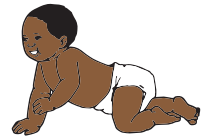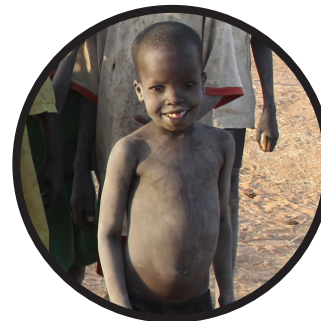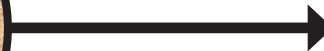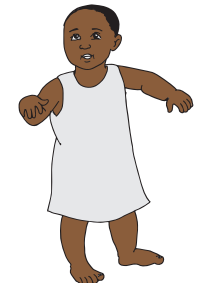

# Suggested Training Activities

1. Show CHWs cards with the different age/sex icons and have them practice identifying them correctly.
2. Have CHWs practice identifying the image on the card and ticking the corresponding box on the individual register sheets.
3. Verbally give the CHWs different age/sex scenarios for the children they'll treat and have them mark the correct box on the register.

# Materials Needed

1. Cards with the age/sex icons
2. Individual color copies of the register sheet
3. Pens

# Patient Register: Medication: Amoxicillin

1. The pink box of amoxicillin is given to infants and the green box is given to toddlers. This corresponds to the correct dosage for infants and toddlers.
2. Mark the box below the image that matches the amoxicillin given to the child according to their age.


  

  

  

AMOXICILLIN TABLETS FOR  
ORAL SUSPENSION USP 125 MG  
2 x 10 TABLETS

| Age From (months to 6 months) |       |       |       |       |       |
|-------------------------------|-------|-------|-------|-------|-------|
| Time                          | Day 1 | Day 2 | Day 3 | Day 4 | Day 5 |
| 12:00                         | 12:00 | 12:00 | 12:00 | 12:00 | 12:00 |
| 18:00                         | 18:00 | 18:00 | 18:00 | 18:00 | 18:00 |


  

  

  

AMOXICILLIN TABLETS FOR  
ORAL SUSPENSION USP 125 MG  
3 x 10 TABLETS

| Age From (months to 6 months) to 6 years |       |       |       |       |       |
|------------------------------------------|-------|-------|-------|-------|-------|
| Time                                     | Day 1 | Day 2 | Day 3 | Day 4 | Day 5 |
| 12:00                                    | 12:00 | 12:00 | 12:00 | 12:00 | 12:00 |
| 18:00                                    | 18:00 | 18:00 | 18:00 | 18:00 | 18:00 |

## Suggested Training Activities

1. Give the CHWs different ages of children and ask them to mark which amoxicillin they would give the child.
2. Have the CHWs explain the difference between the pink and green boxes of amoxicillin.
3. Ask the CHW to explain how to give the amoxicillin.

## Materials Needed

1. Boxes of amoxicillin for infants and toddlers
2. Individual color copies of the register sheet

## Patient Register: Medication: Albendazole

1. Albendazole is only given to toddlers. (this is why the section is only below the toddler icon)
2. Half a pill is given to toddlers 1-2 years. A whole pill is given to toddlers 2 years or older.
3. If albendazole is given to the child, mark below the image that matches the albendazole given.

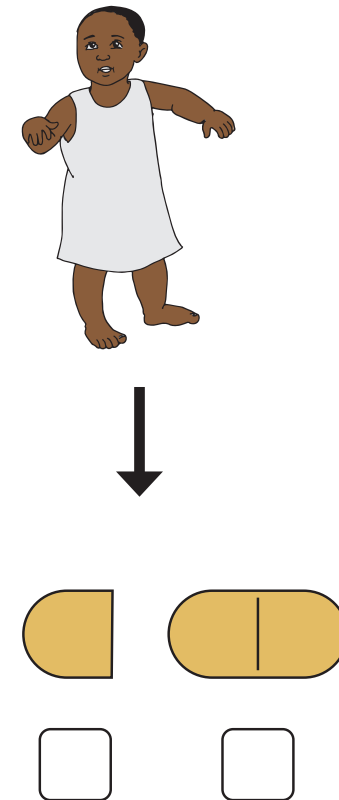

## Suggested Training Activities

1. Give the CHWs different ages of children and ask them to mark which albendazole they would give to the child.
2. Show different cards with the medication images and ask CHWs to identify what drugs they are and who they are used for.
3. Ask the CHWs to come up with a rhyme or song to remember how to give the correct dosage of albendazole.

## Materials Needed

1. Cards with the different medication icons
2. Individual color copies of the register sheet
3. Samples of albendazole

## Patient Register: ID System

1. Carefully fold and tear the patient ID from the patient's page in the register and place it in a small plastic bag.
2. Give the ID card to the child's caregiver and explain to them to keep it in a safe place and bring it back each visit.
3. When the caregiver returns the next week, first open the register to the pages with the right color. Then match the colored bar of the same size and color on the register page.

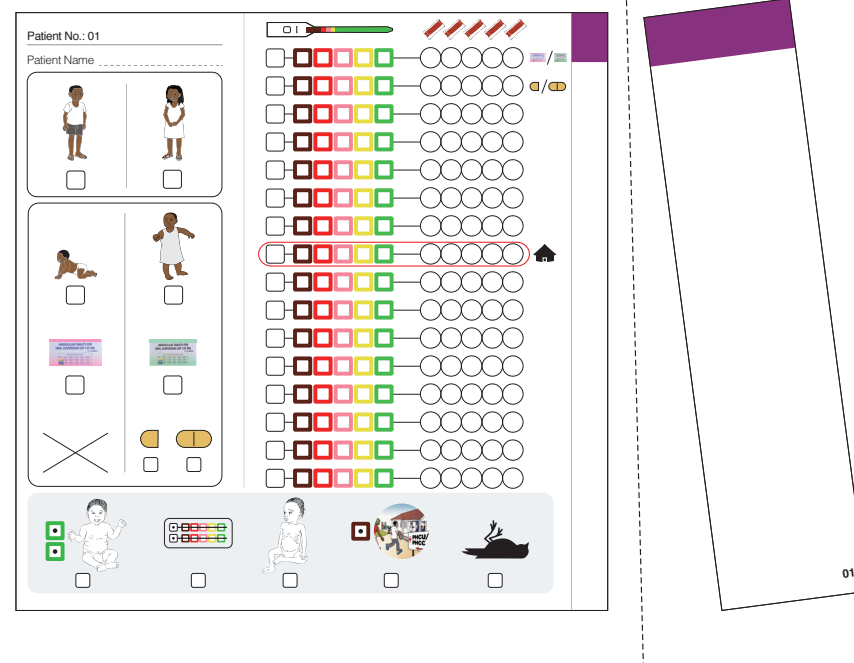

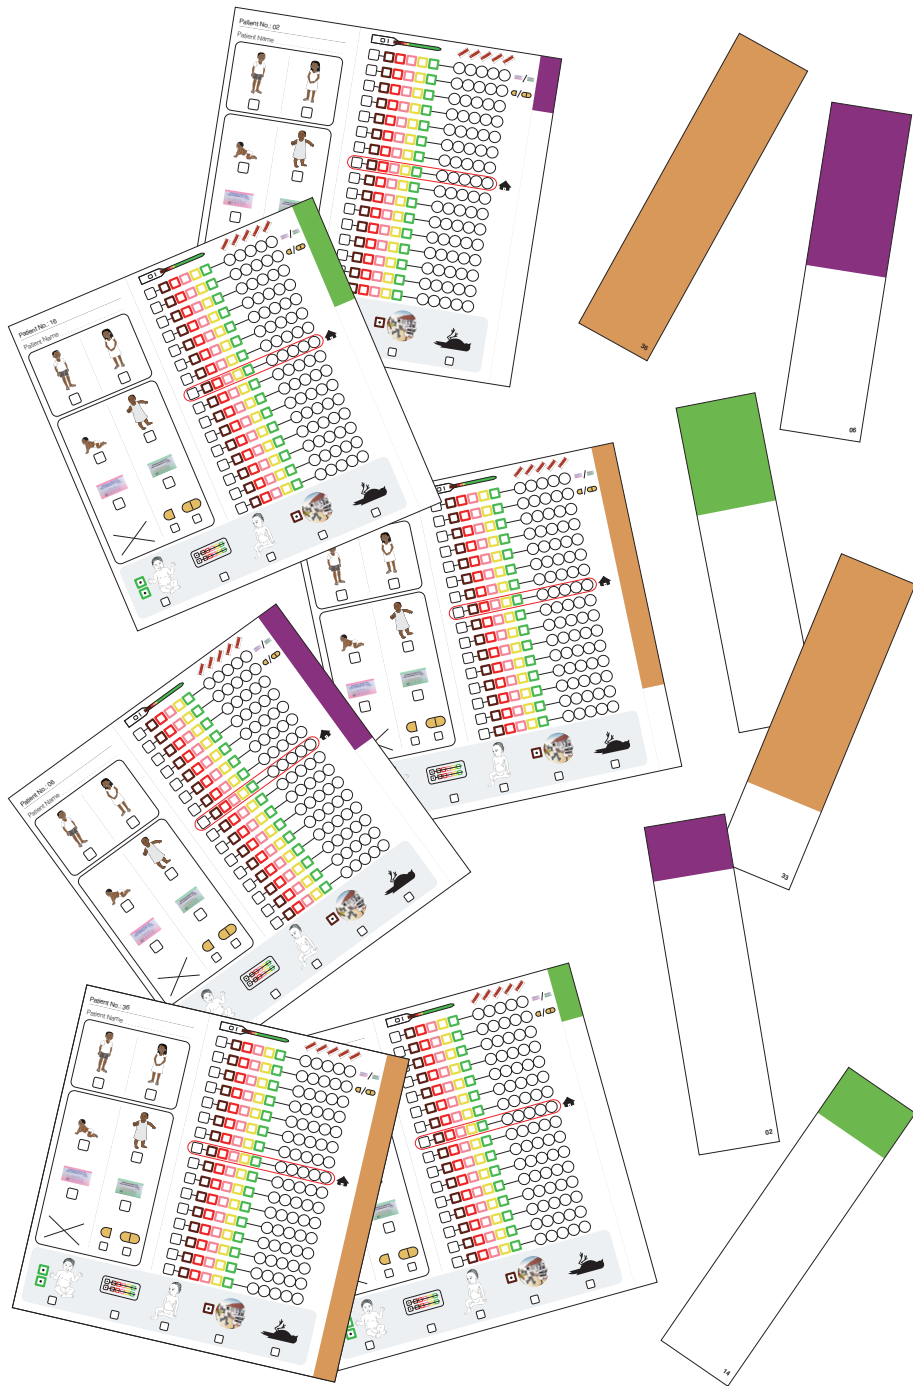

## Suggested Training Activities

1. Separate a book of registers and patient IDs, give each CHW 3-5 patient IDs of different colors and ask them to find the corresponding register page.

## Materials Needed

1. Full patient register

# Patient Register: Status and treatment monitoring

1. Every week, mark the MUAC reading taken for the child and the RUTF dosage provided. One week = one row.

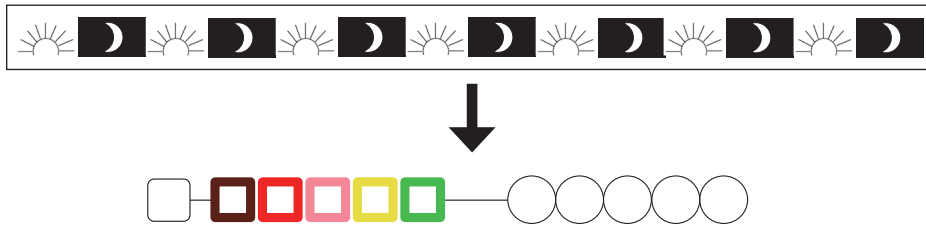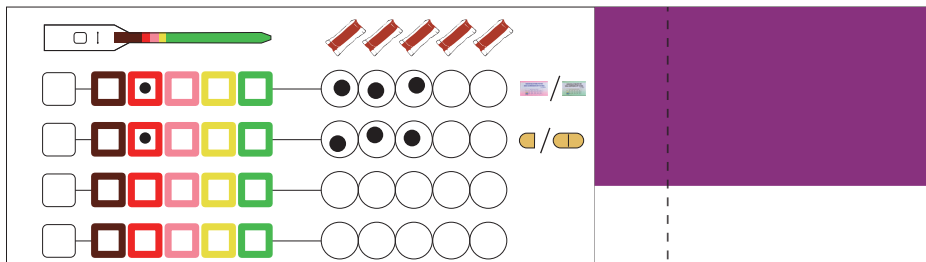

2. If the child is absent, mark the left most box and draw a line through the entire row. This reminds CHWs to skip to the next row when the child returns the following week.

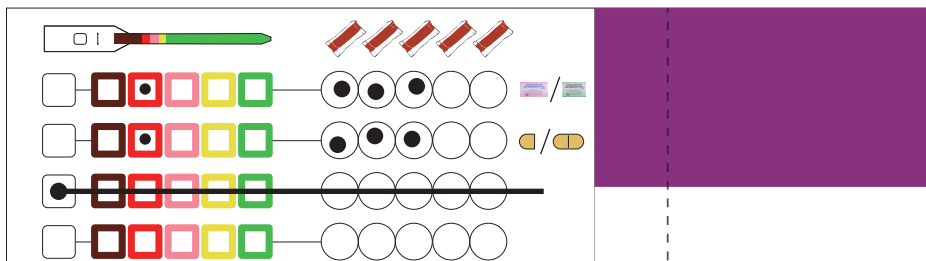

## Suggested Training Activities

1. Practice counting out 16 weeks with the CHWs.
2. Prepare pieces of paper with the numbers 1-16 written on them. Have the CHWs take turns picking numbers out of a bag and pointing to the correct line on the register.
3. Draw a number to indicate the week and give the CHW a practice MUAC measurement and RUTF dosage to fill in.
4. Ask the CHWs to mark the next week as absent. Make sure they mark the correct row.

## Materials Needed

1. Pieces of paper with the numbers 1-16 written on them
2. Individual color copies of the register sheet
3. Pens

# Patient Register: Discharge Performance Indicators

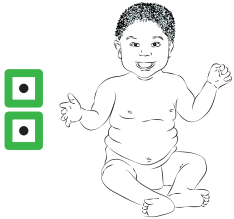

## Cured

Child is in the green zone for the 2nd visit in a row and can be discharged.

This child is healthy and no longer malnourished.

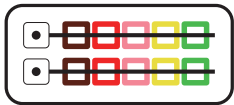

## Default:

Child is absent for 2 weeks in a row and has dropped out of the program.

This child should be discharged. If the child returns, they can be readmitted.

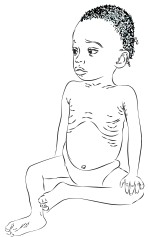

## Non-responder:

Child is still malnourished after 16 weeks in the program.

This child should be discharged and referred.

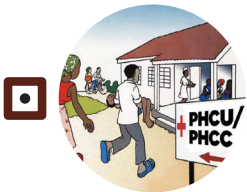

## Transfer:

Child deteriorates into the dark red zone, develops a danger sign or doesn't have an appetite.

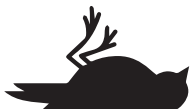

## Death:

Child passes away while enrolled in the program.

## Suggested Training Activities

1. Discuss the possible discharge outcomes that a CHW might encounter when a child is under their care.
2. Show the CHWs flash cards with the outcome icons and ask them to identify the outcome criteria (when will they know this child is cured, defaulted, non-respondent, transfer, etc.)
3. Ask them to identify the outcome and point to where they would make the mark on the register.

## Materials Needed

1. Cards with outcome icons
2. Individual color copies of the register sheet

# 1.4

## Key RUTF Feeding Messages

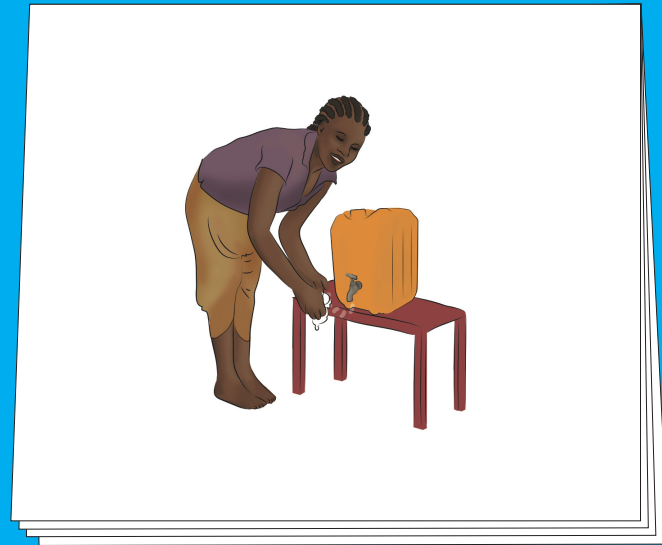



# Flipchart: Key RUTF Feeding Messages

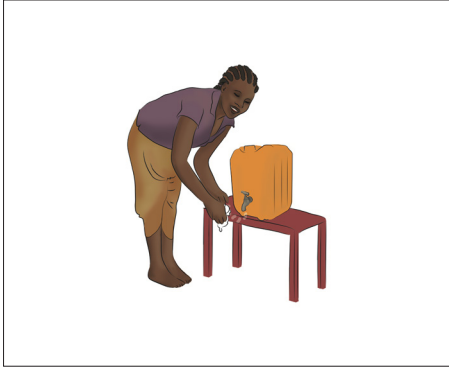

1. Wash your hands with soap and water before giving RUTF.

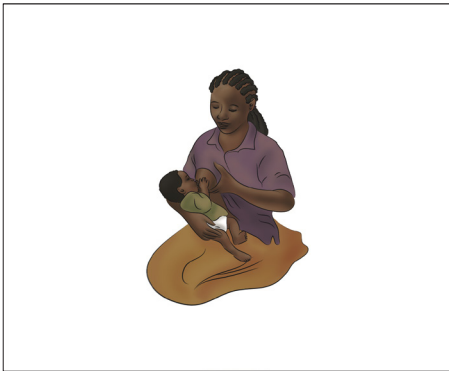

2. Before giving RUTF, breastfeed your child.

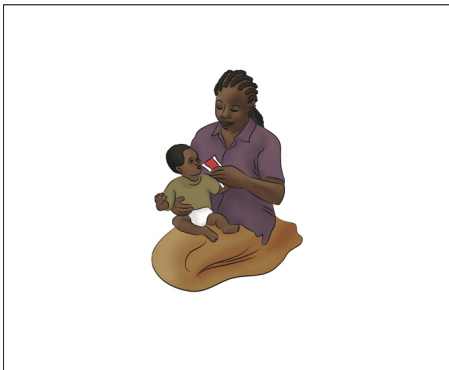

3. After breastfeeding, feed your child as much RUTF as she/he can eat

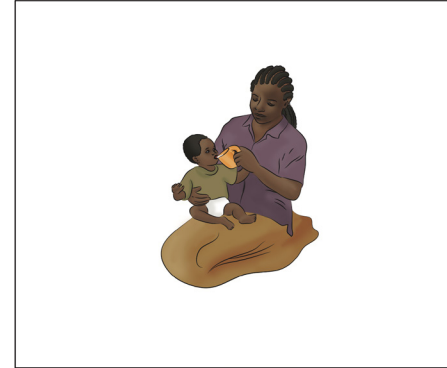

4. Give your child plenty of clean water to drink.

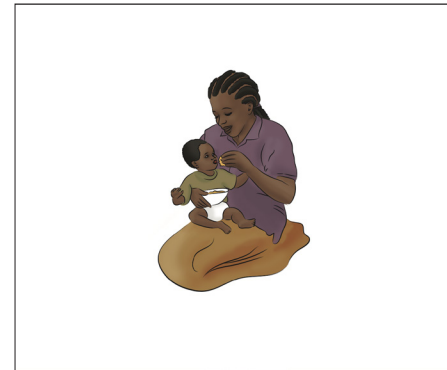

5. If your child is still hungry, feed your child family food. Make sure your children eat the correct amount of RUTF before giving additional food.

## Suggested Training Activities

1. Ask the CHWs to describe what is happening in the images, then explain the message when the discussion is finished.

## Materials Needed

1. Flipcharts

# Part 2: Essential Procedures

## **2.1**

# **Assessment of Oedema**

## Danger Signs: Assessment of Oedema

1. Press thumbs on the top of both feet for 3 seconds (use locally appropriate words or song to help count to 3 seconds).
2. Only light pressure is required, as if pressing into a ripe mango.
3. If there is an indent like seen in the photo below in both feet after you lift your thumbs, then the child has oedema and needs to be referred immediately.

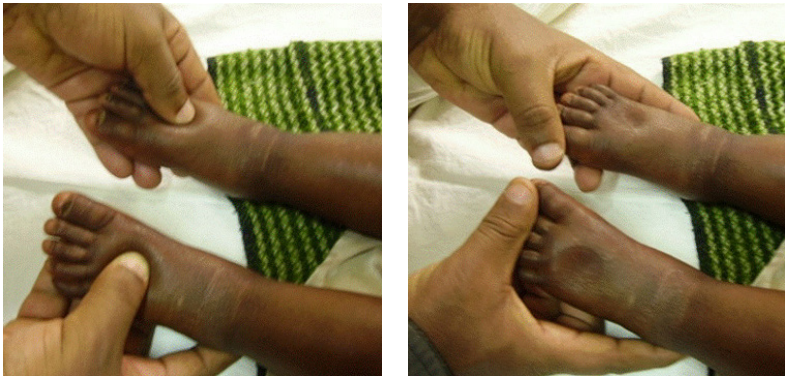

## Suggested Training Activities

1. Have the CHWs practice on each other's feet. Trainers should check to make sure they are applying the correct amount of pressure for 3 seconds

## 2.2 Appetite Test

# Danger Signs: Appetite test

1. The caregiver should wash his/her hands.
2. Find a quiet area to conduct the test.
3. Have the caregiver offer the RUTF from the packet or if the child is too small or weak, caregiver can use his/her hands to feed the child.
4. The caregiver should encourage the child to eat and offer the RUTF gently. Do not force the child to eat the RUTF. Be patient and observe, the test may take up to 30 minutes.
5. Have plenty of water for the child to drink while he/she is taking RUTF.

If the child eats more than 1/3 of the sachet, they pass

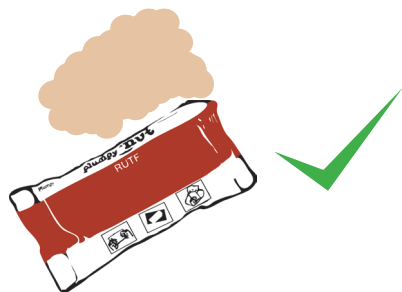

If the child eats less than 1/3 of the sachet, they fail and need to be referred

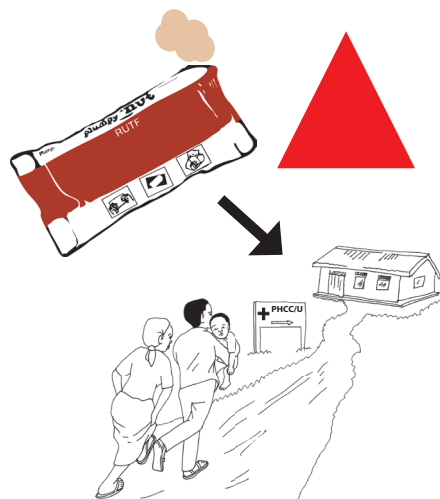

## Suggested Training Activities

1. Show the CHWs a picture of a goat (or other commonly eaten food). If they were to eat the goat over three days, how would they divide the goat so they would have an equal amount each day? Have the CHWs draw with a pen how they would divide the goat into 3. Now how would they divide the RUTF sachet into three equal portions?
2. Give each CHW an image of a sachet with RUTF and ask them to divide it into three equal parts with a pen.
3. Have CHWs observe during an OTP day how to conduct an appetite test. Pass around the sachet once the child has completed the test so the CHWs know how it should look and feel.

## Materials Needed

1. Image of sachet of RUTF
2. Images of goats or other commonly eaten items
3. Pens

## 2.3 Danger Signs

### Refer:

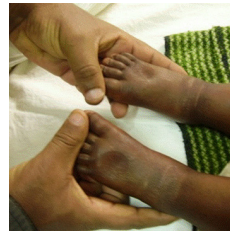

Bilateral pitting oedema present

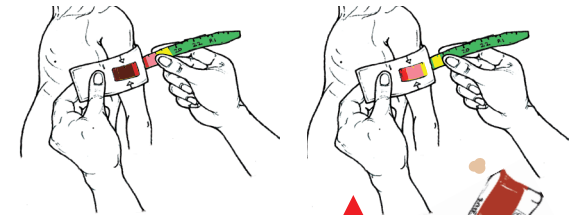

Dark red MUAC

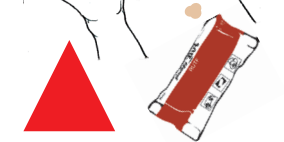

Red/Pink MUAC plus danger signs or poor appetite

### Treat:

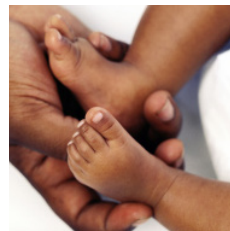

No bilateral pitting oedema present

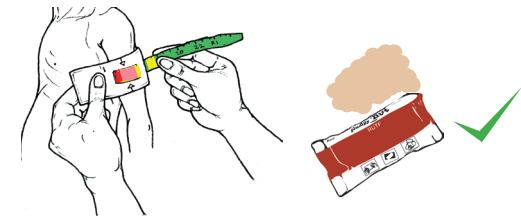

Red/Pink MUAC and no danger signs and good appetite

# Danger Signs: Step 1: Look

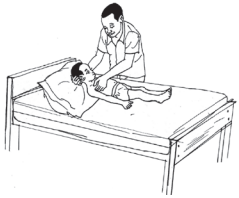

Stiff neck

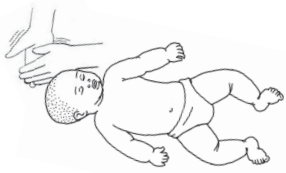

Unconscious or  
abnormally sleepy

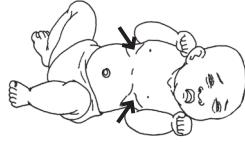

Chest in-drawing

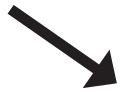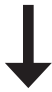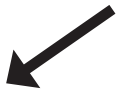

**Danger!**

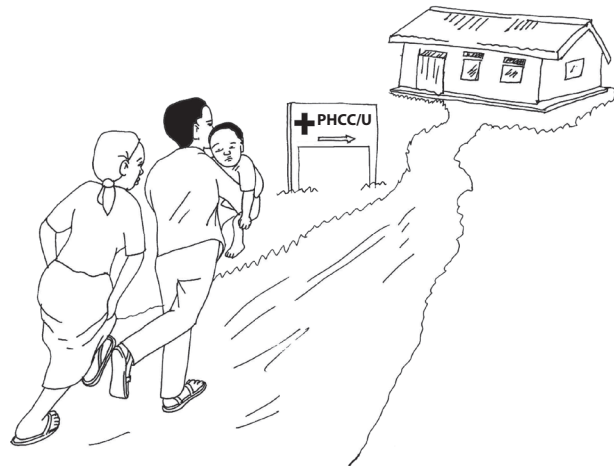

Refer child to health facility  
immediately

# Danger Signs: Step 2: Ask

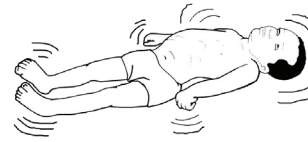

Convulsions

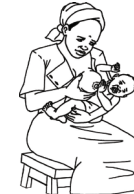

Unable to  
breastfeed or drink

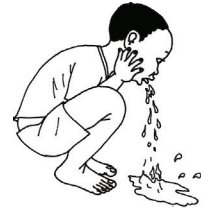

Vomits everything

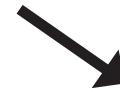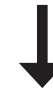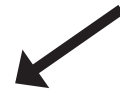

**Danger!**

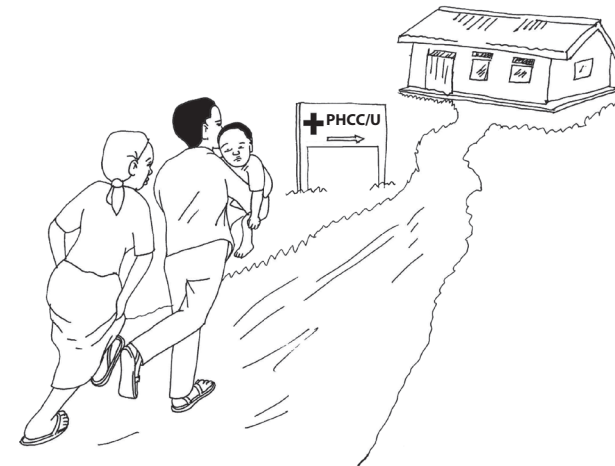

Refer child to health facility  
immediately

## Danger Signs: Step 3: Assess

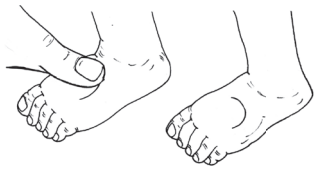

Swelling of both feet

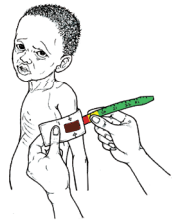

Dark Red MUAC

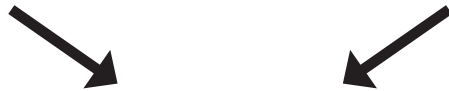

**Danger!**

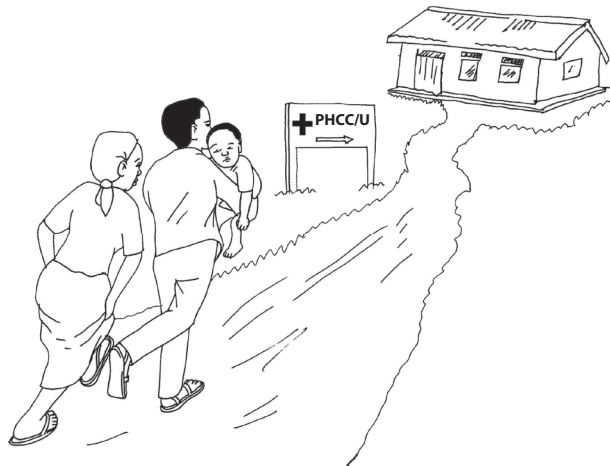

Refer child to health facility  
immediately

## Suggested Training Activities

1. Ask the CHWs to list the danger signs.
2. Ask the CHWs to describe how they can identify the danger signs.

## Materials Needed

1. iCCM job aid with danger signs



# Part 3: Simplified SAM Treatment Protocol

# Simplified SAM Treatment Algorithm:

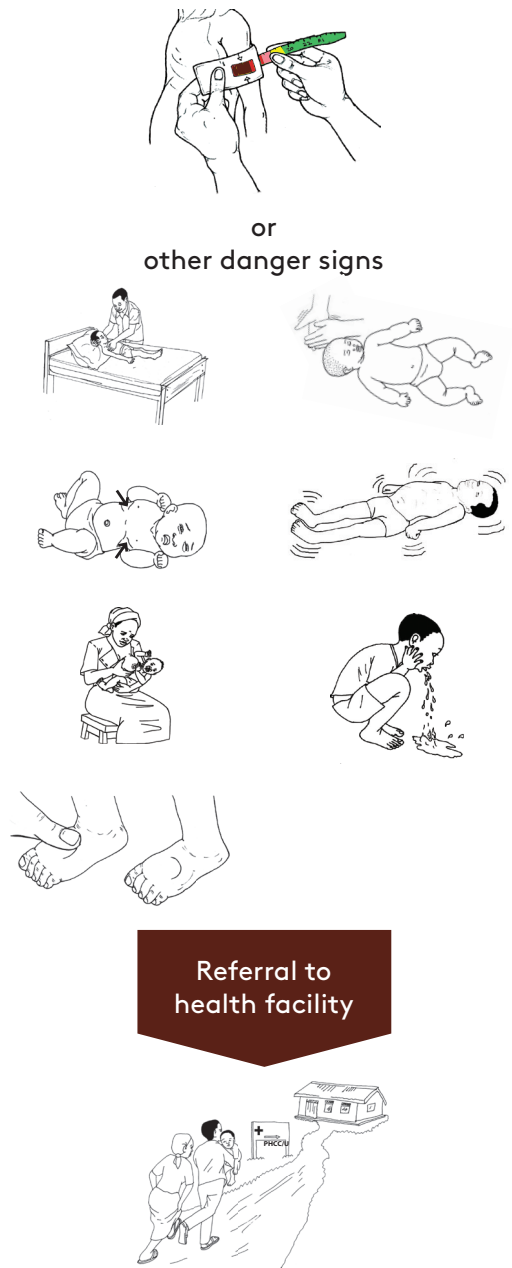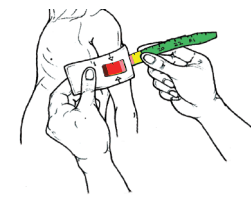

**Appetite Test**

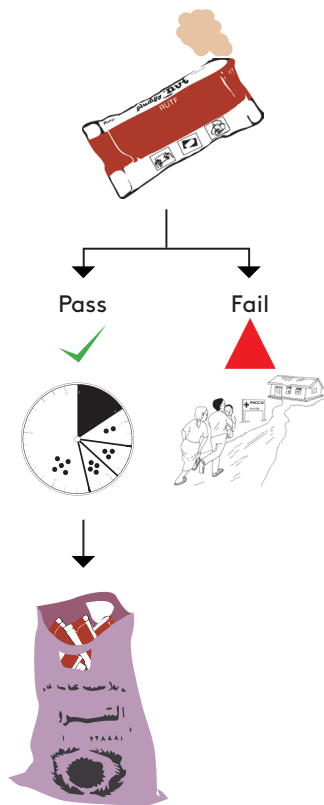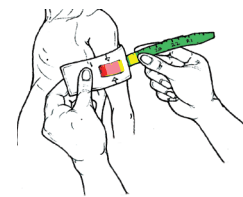

**Appetite Test**

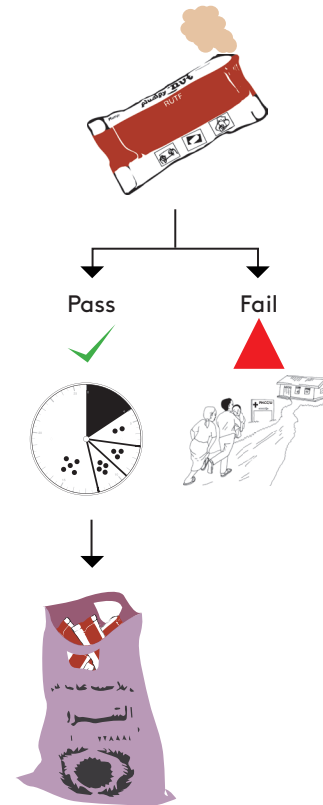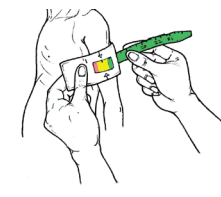

**Referral to TSFP**

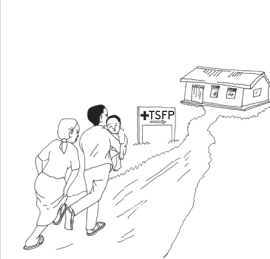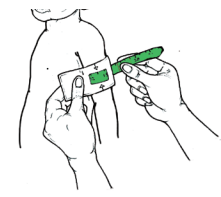

**Normal**

Tell the caregiver their child is not malnourished and encourage them to continue feeding their child the same way.

# 3.1 First Visit (Week 1)

# First Visit: Assess

1. Welcome the caregiver and child

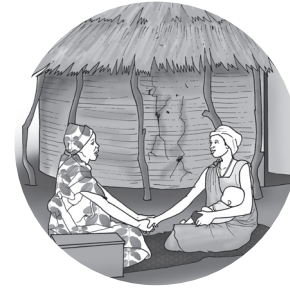

2. Ask for the child's name and age. (confirm child is between 6-59 months)

3. Ask for the reason the child is here today.

4. Assess for general danger signs, refer immediately if they exist.

## ▲ 3. General Danger Signs

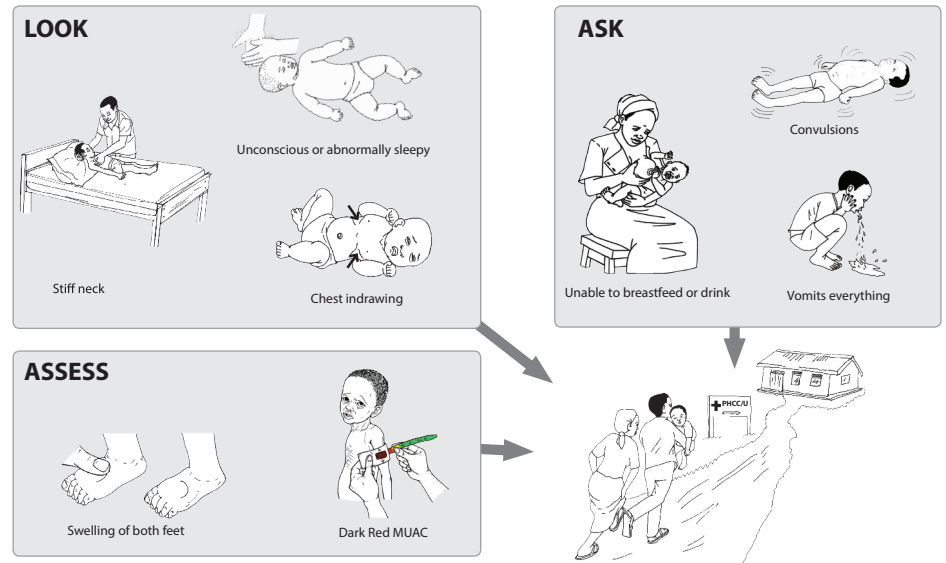

# First Visit: Assess

5. If no danger signs exist, take the MUAC of the child.

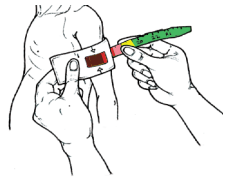

If MUAC is dark red,  
refer immediately

Referral to  
health facility

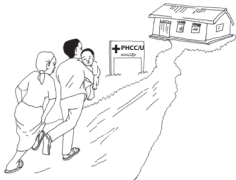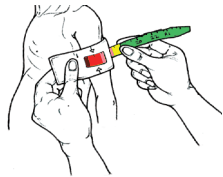

If MUAC is red, test  
appetite first

Appetite Test

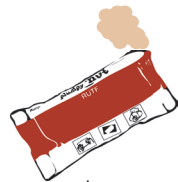

Pass

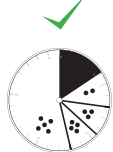

Weigh Child

Fail

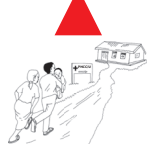

Referral  
to health  
facility

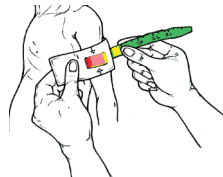

If MUAC is pink, test  
appetite first

Appetite Test

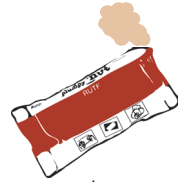

Pass

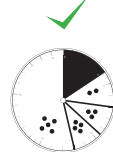

Weigh Child

Fail

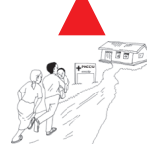

Referral  
to health  
facility

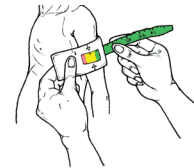

If MUAC is yellow,  
refer to TSFP

Referral to TSFP

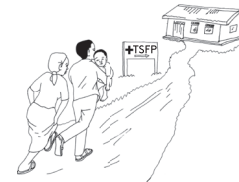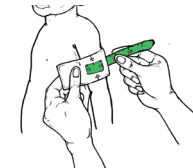

Normal

Tell the caregiver  
their child is not  
malnourished  
and encourage  
them to continue  
feeding their child  
the same way.

If the child has a red or pink MUAC and a poor appetite, refer immediately.

If the child has a red or pink MUAC and a good appetite, you will weigh and treat. Open the register to the next blank page and start treatment. (see next page)



# First Visit: Treat

2. Record the child's information on the register: sex, age, MUAC color, and dosage scale reading.

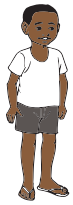

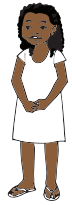


Record child's sex

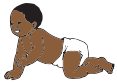

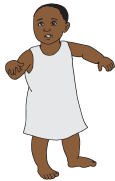


Record child's age

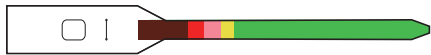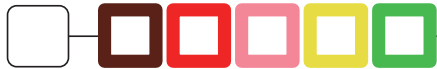

Record MUAC color

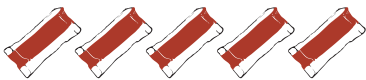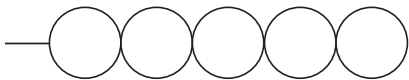

Record dosage scale reading

3. Count out the week's dose of RUTF using the dosage calculator. Remove one sachet for the appetite test.

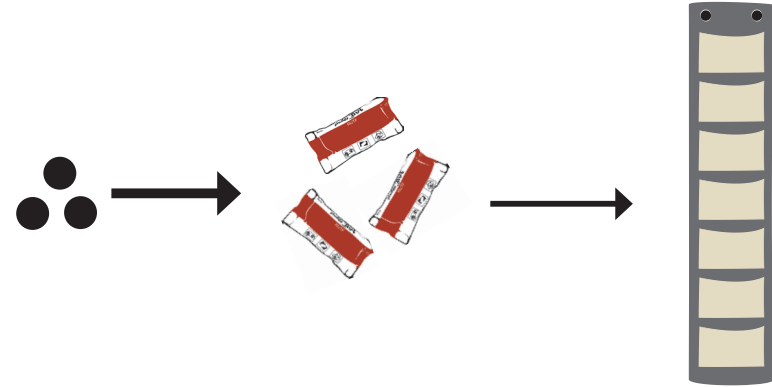

4. Administer amoxicillin based on the child's age and record.

Advise caregiver how to correctly give amoxicillin at home. It is very important the child takes the entire dose until finished.

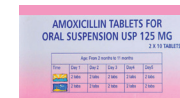

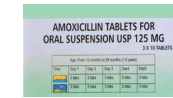


**Amoxicillin is given to every severely malnourished child that you treat on the day of admission regardless of whether a child has pneumonia or not.**

# First Visit: Treat

5. Counsel the caregiver on how to give RUTF at home using the flipchart. Ask the mother if she has any questions.

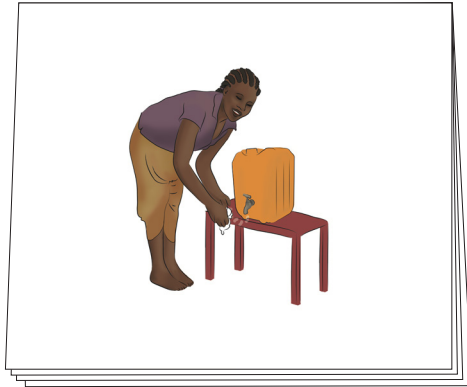

6. Give the RUTF dosage and ID card to the caregiver and instruct her to return again in 7 days.

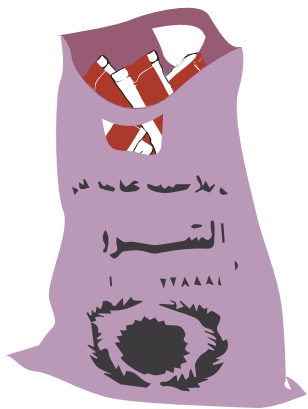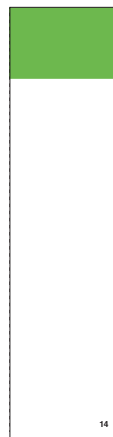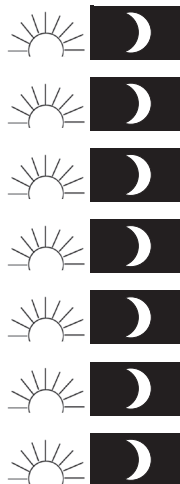

## 3.2 Week 2



# Week 2: Assess

1. Match the ID with the correct page in the register.

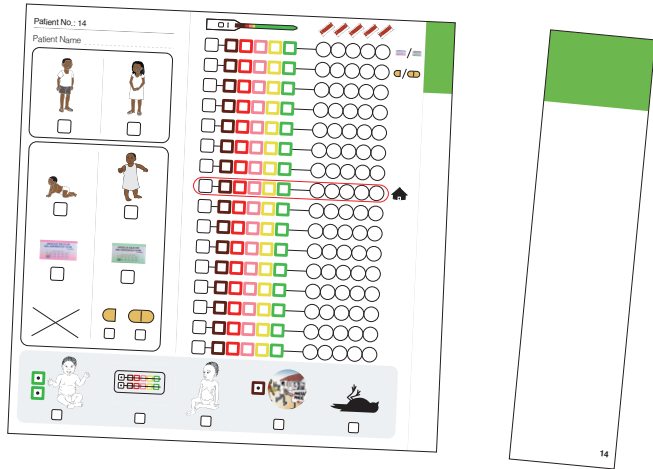

2. Ask how the child was in the past week and whether they finished all the RUTF.

3. Assess for general danger signs.

## 3. General Danger Signs

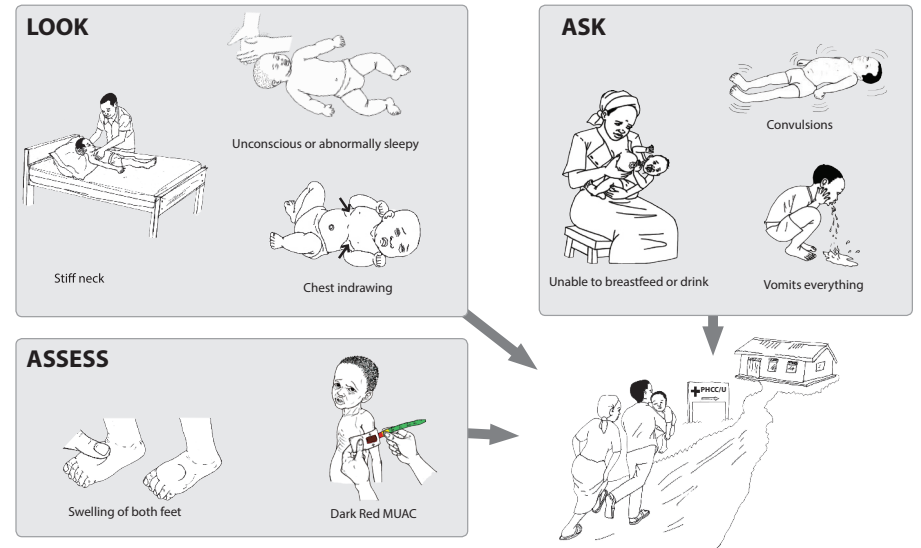

4. Conduct the appetite test with one sachet of RUTF.

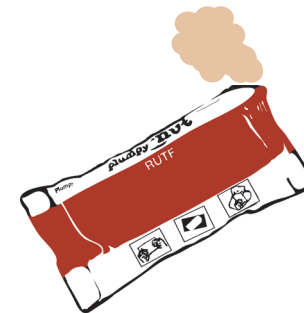

# Week 2: Treat

1. If the child has no danger signs and passes the appetite test, weigh the child and continue treatment.

2. Record the second week's measurements on the register: MUAC color and dosage scale reading.

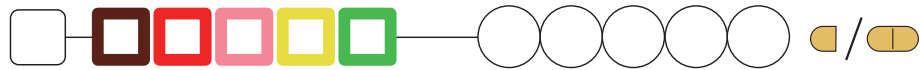

3. Count out the week's dose of RUTF using the dosage calculator. Remove one sachet for the appetite test.

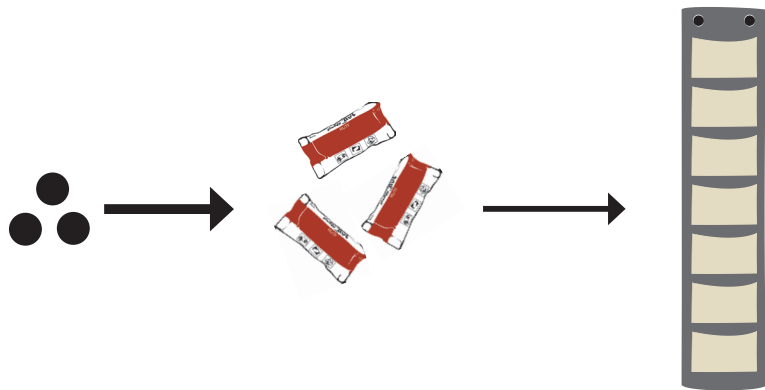

4. Administer albendazole based on the child's age and record.

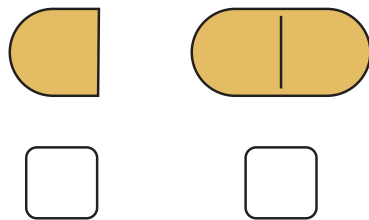

5. Counsel the caregiver on how to give RUTF at home using the flipchart. Ask the mother if she has any questions.

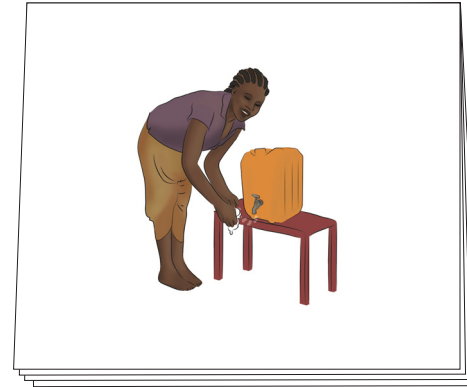

6. Give the RUTF dosage and ID card to the caregiver and instruct her to return again in 7 days.

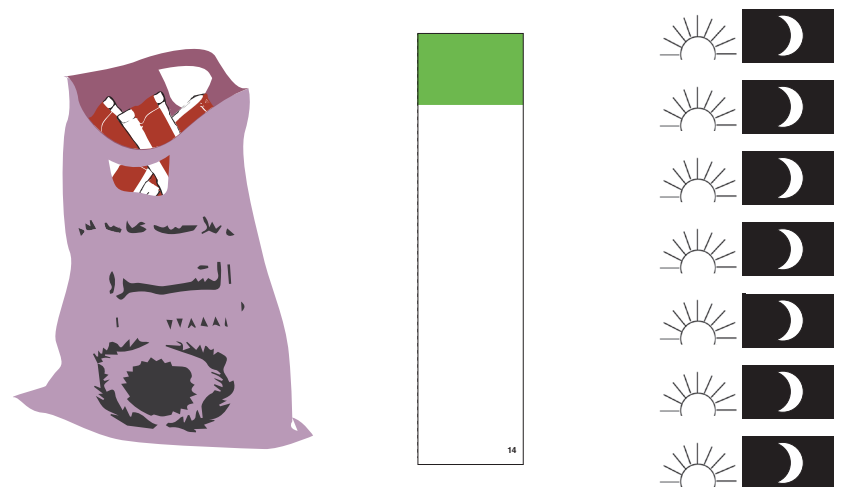

# 3.3

## Week 3 - 16

# Week 3 - 16: Assess

1. Match the ID with the correct page in the register.

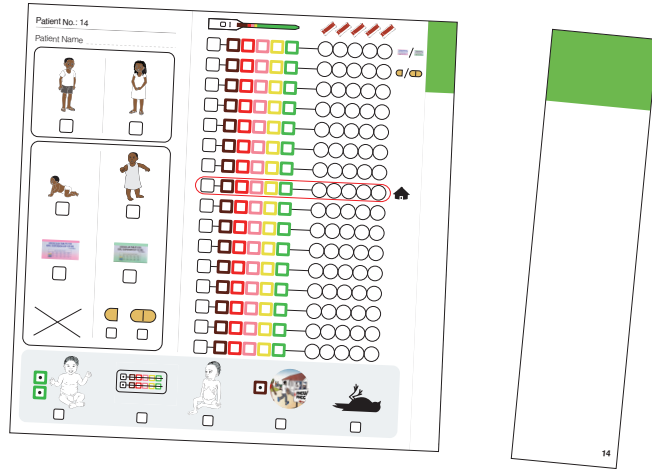

2. Ask how the child was in the past week and whether they finished all the RUTF.

3. Assess for general danger signs.

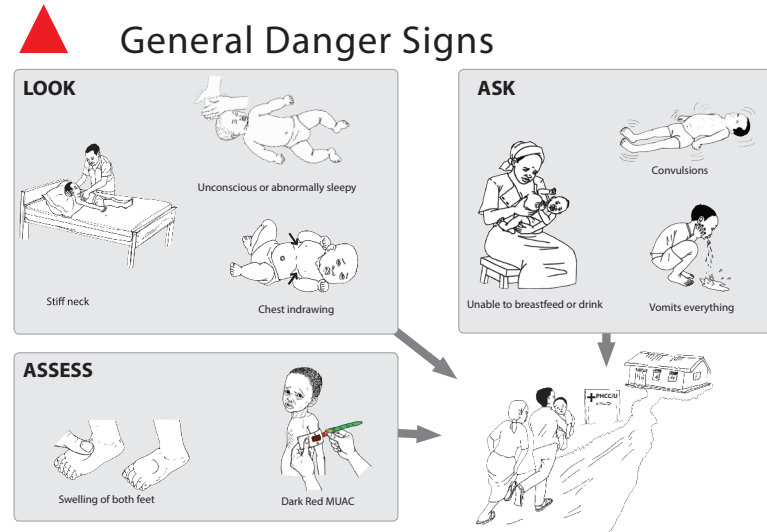

4. Conduct the appetite test with one sachet of RUTF.

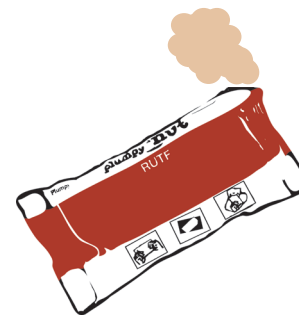

# Week 3 - 16: Treat

1. If the child has no danger signs and passes the appetite test, weigh the child and continue treatment.

2. Record the third week's measurements on the register: MUAC color and dosage scale reading.

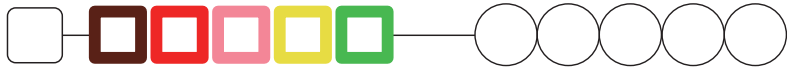

3. Count out the week's dose of RUTF using the dosage calculator. Remove one sachet for the appetite test.

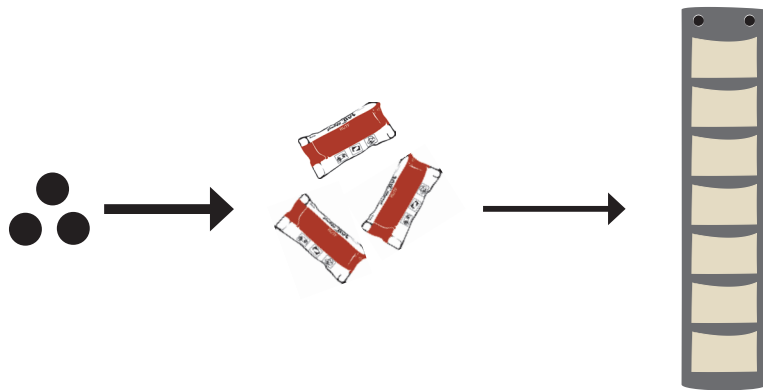

4. Give no medication, but in week 4 refer the child to the health facility for measles vaccination.

5. Counsel the caregiver on how to give RUTF at home using the flipchart. Ask the mother if she has any questions.

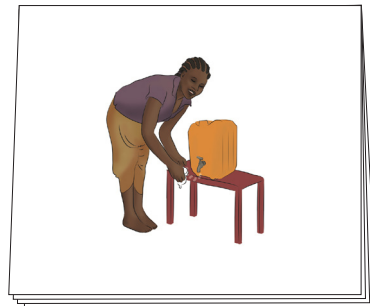

6. Review the child's record to see if any outcomes or home visits apply.

If no: give the RUTF dosage and ID card to the caregiver and instruct her to return again in 7 days.

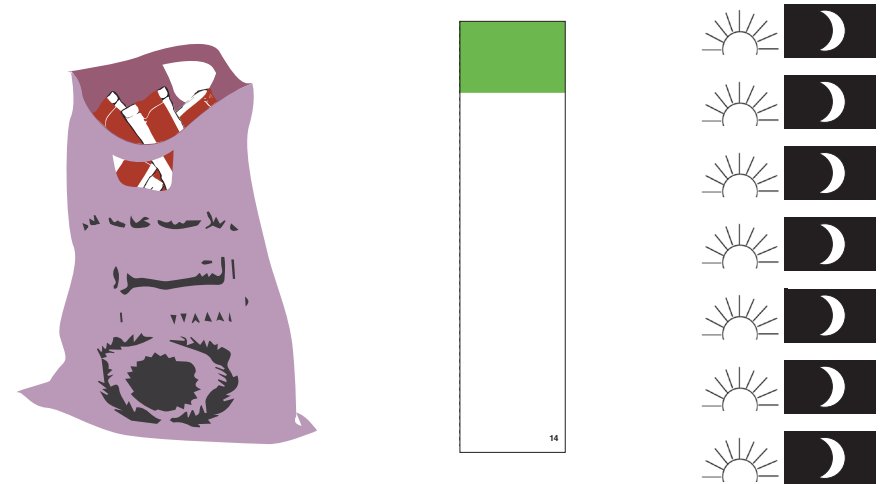

If yes:

1. Explain the outcome to the caregiver
2. Give any final rations or referral cards
3. Record the outcome

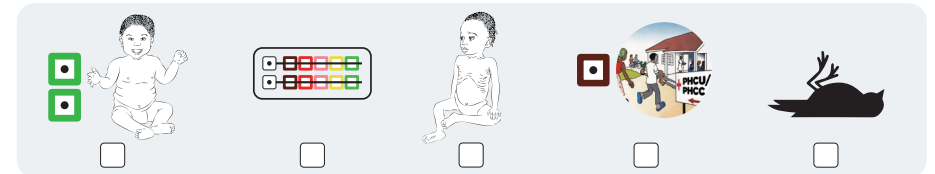

## 3.4 Discharge Criteria

## Discharge Criteria:

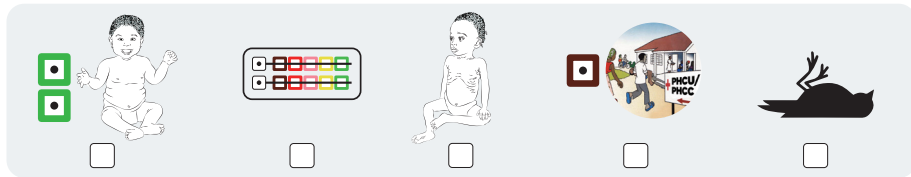

1. This information can only be entered when one of the 5 outcomes has been reached.

2. Once a child has readings which match one of the status options, mark the appropriate box below the image that matches the child's status. This child is then discharged from the program.

3. Once an outcome has been selected, the patient register is closed and no further changes should be made.

4. If the child becomes severely malnourished again in the future, a new page in the register will need to be made and the child will need to be readmitted.

## Suggested Training Activities

1. Prepare flash cards with outcome icons to practice identification.
2. Practice recording different scenarios, going through all the outcomes.
3. Have CHWs take a filled out register and present the case.
4. Give CHWs an outcome and have them fill out to register - How does the register need to look in order to reach that outcome?
5. Have CHWs explain, then act out, what they have to do on a weekly basis when treating for malnutrition (asses for danger signs, measure MUAC, give appetite test) vs. what they have to do only in week 1 (start a new register page, give amoxicillin) and week 2 (give albendazole to toddlers)

## Materials Needed

1. Cards with outcome icons
2. Individual copies of the register sheets (blank)
3. Individual copies of the register sheets (filled in with different scenarios)

# Special Cases

1. If: Child has a dark red MUAC and refuses to go to the health facility for treatment, explain to the caregiver that the child may not recover with RUTF since they have medical complications the CHW cannot treat and likely no appetite. If they still refuse, take action.

**Action: Treat by CHW following the protocol for red/pink MUAC admission**

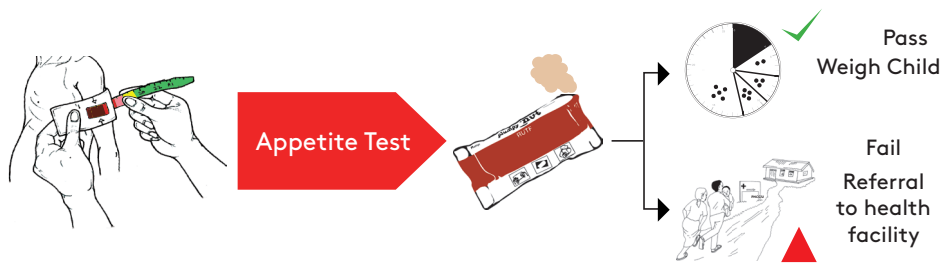

2. If: Child is under treatment and develops a danger sign at any time.

**Action: Refer to health facility**

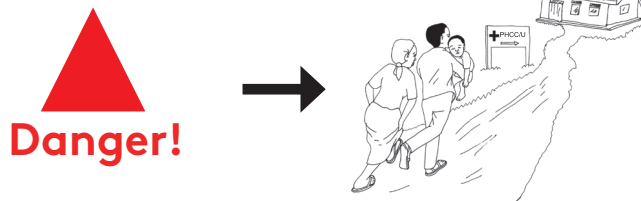

3. If: Child is under treatment and falls in the dark red zone.

**Action: Refer to health facility**

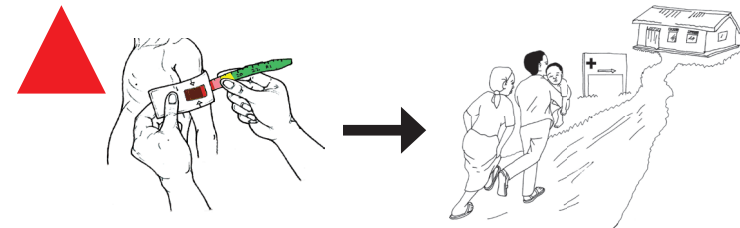

4. If: Child is under treatment and misses a visit.

**Action: Make a home visit and encourage the caregiver to return**

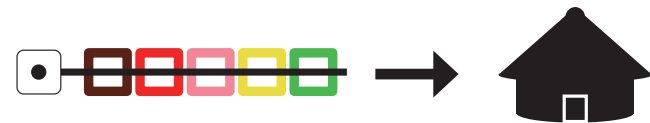



# Home Visits:

5. If: Child is under treatment and has 3 successive visits in the same zone.

**Action: Home visit.** Ask the caregiver to show the remaining sachets of RUTF and watch the child eat a sachet. Advise the caregiver not to share the RUTF with others.

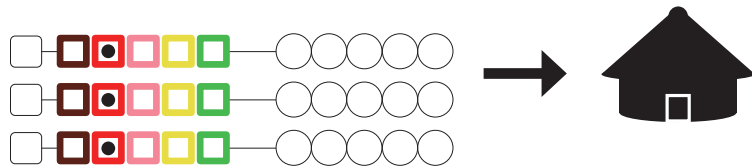

6. If: Child is under treatment and has 4 successive visits in the same zone.

**Action: Referral to health facility**

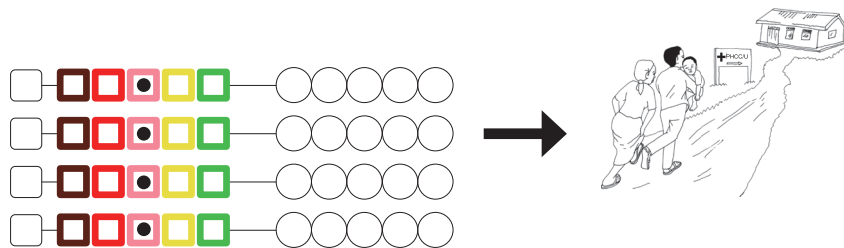

Tasks:

1. Remind the caregiver to give the child plenty of clean water to drink and to wash hands before giving the RUTF.

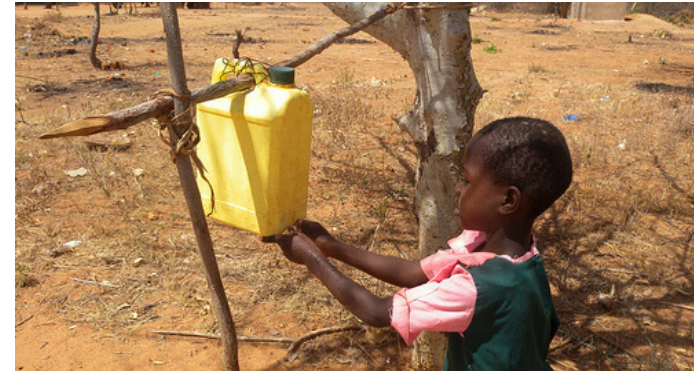

2. Ask the caregiver to show the remaining sachets of RUTF and watch the child eat a sachet. See if the correct number of sachets remains. Advise the caregiver not to share the RUTF with others.

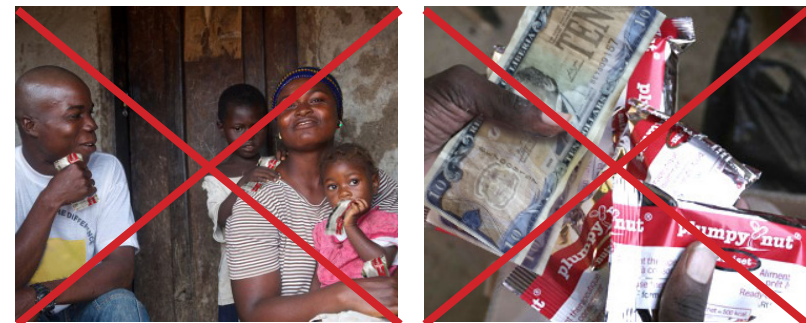

3. Determine the reasons for missing weekly visits.

4. Counsel families on the importance of the treatment regimen.

# Part 4: iCCM + SAM Treatment Protocol

# Malaria + SAM

1. Fever or history of fever in the last 3 days.
2. SAM.

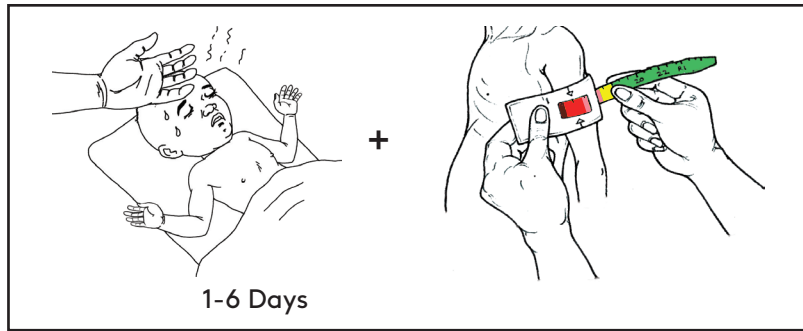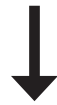

Treat with ACT according to iCCM protocol and RUTF according to dosage scale

| AGE         | TREATMENT | DAY 1 | DAY 2 | DAY 3 | DAY 4 | DAY 5 | DAY 6 | DAY 7 |
|-------------|-----------|-------|-------|-------|-------|-------|-------|-------|
|             |           |       |       |       |       |       |       |       |
| 6-12 months |           |       |       |       |       |       |       |       |
| 1-5 years   |           |       |       |       |       |       |       |       |

1. Fever for more than 7 days
2. SAM.

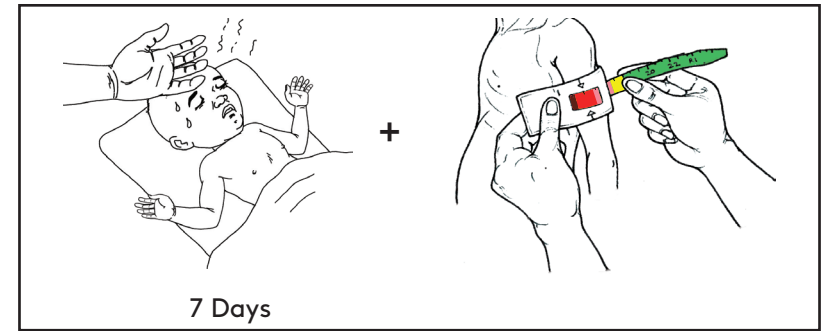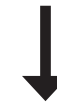

Refer with Pre-referral Treatment

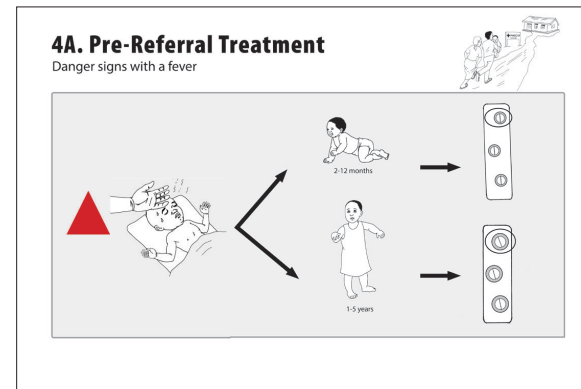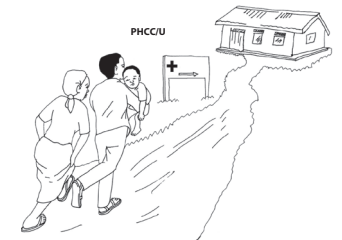

# Pneumonia + SAM

1. Cough with fast breathing for fewer than 21 days.
2. SAM.

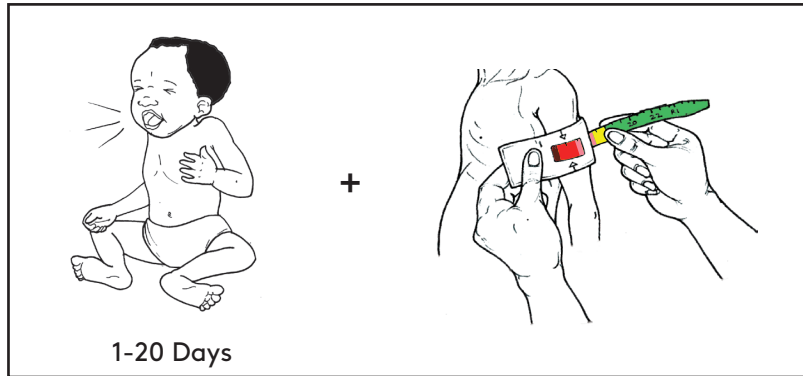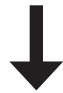

ONE dose of amoxicillin at admission depending on the child's age + RUTF according to dosage scale.

| AGE             | TREATMENT | DAY 1 |  | DAY 2 |  | DAY 3 |  | DAY 4 |  | DAY 5 |  | DAY 6 |  | DAY 7 |  |
|-----------------|-----------|-------|--|-------|--|-------|--|-------|--|-------|--|-------|--|-------|--|
|                 |           |       |  |       |  |       |  |       |  |       |  |       |  |       |  |
| <br>6-12 months |           |       |  |       |  |       |  |       |  |       |  |       |  |       |  |
|                 |           |       |  |       |  |       |  |       |  |       |  |       |  |       |  |
| <br>1-5 years   |           |       |  |       |  |       |  |       |  |       |  |       |  |       |  |
|                 |           |       |  |       |  |       |  |       |  |       |  |       |  |       |  |

1. Cough with fast breathing for more than 21 days.
2. SAM.

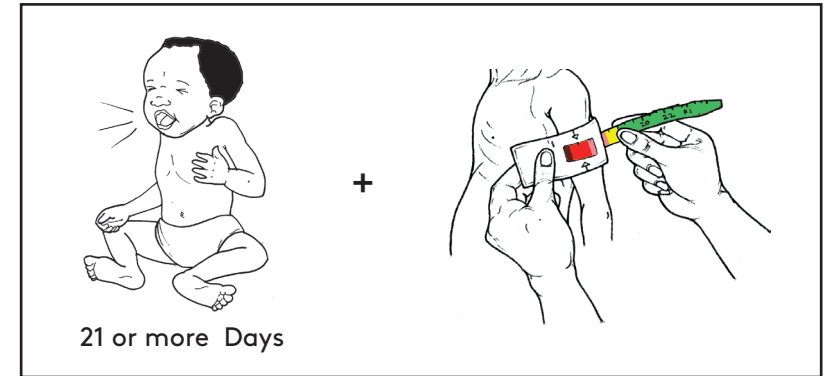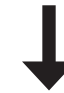

Refer with Pre-referral Treatment

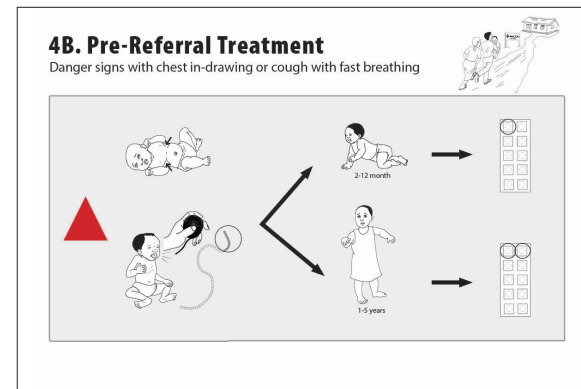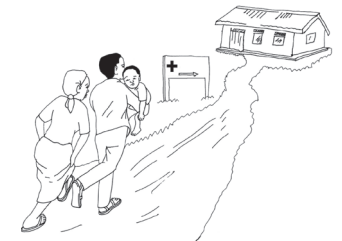

# Diarrhea + SAM

1. Diarrhea for fewer than 14 days.

2. SAM.

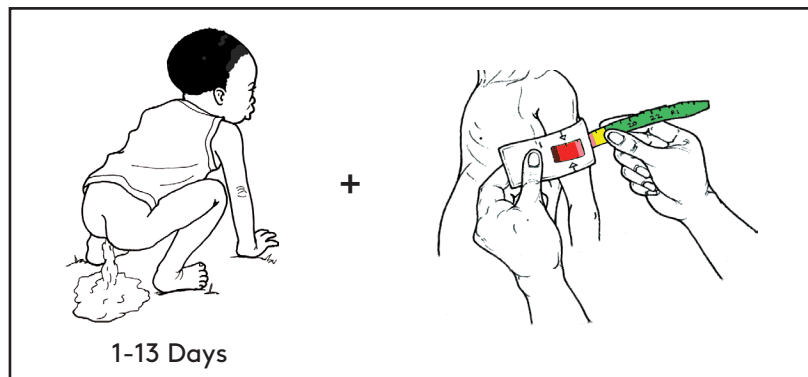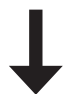

Do not give ORS or ZINC tablets, these nutrients can be found in RUTF. Advise the caregiver to breastfeed and give RUTF.

| AGE                    | TREATMENT | DAY 1 | DAY 2 | DAY 3 | DAY 4 | DAY 5 | DAY 6 | DAY 7 |
|------------------------|-----------|-------|-------|-------|-------|-------|-------|-------|
|                        |           |       |       |       |       |       |       |       |
| <br>7 months - 5 years |           |       |       |       |       |       |       |       |

1. Diarrhea for more than 14 days.

2. SAM.

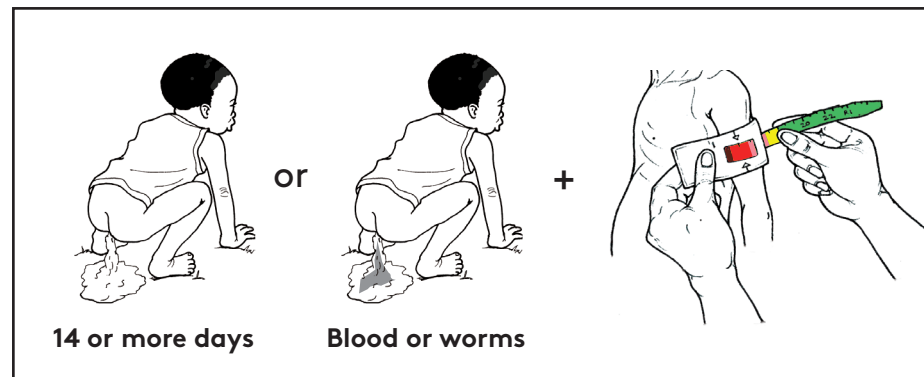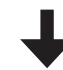

Refer with Pre-referral Treatment  
Do not give ORS. Instead, give the child sugar water.  
(4 heaping teaspoons of sugar dissolved in a cup of clean water)

**4C. Pre-Referral Treatment**  
Danger signs with diarrhoea

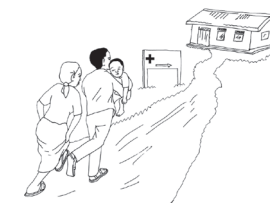

## Suggested Training Activities

1. Prepare different scenarios with combinations of pneumonia, diarrhea, malaria, and SAM, with and without danger signs. Ask the CHWs to describe the steps for treatment or referral.
2. Have the CHWs role play with each other, practicing the assessment steps and administering medication.

## Materials Needed

1. iCCM/nutrition assessment and treatment materials

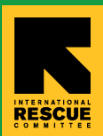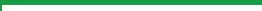

Supplement: MCN-15-e12716-s001.pdf [file MCN-15-e12716-s001.pdf]
